# Supplementary material
Source: publisher figshare collection journal article supplement (https://geolsoc.figshare.com/ndownloader/files/9794914)
Supplement: Supplementary file 1 [file 9794914]

Site name	Latitude (Planetocentric)	Longitude (East)	Gully type	Substrate	Orientation	Notes
D1: Central Matara	-49.5	34.7	ACA and linear	Sand	SW	Annual (winter) changes in dune gully. Changes include major flows as well as channel incision and reshaping. See also Pasquon et al. (2016).
D2: Eastern Matara	-49.5	34.9	ACA	Sand	E	Annual (winter) changes in large ACA dune gully. Events include massive channel changes as well as apron extension and development of sinuosity.
D3: Kaiser crater dunes	-46.7	20.1	ACA	Sand	W	Diverse annual (winter) activity in gullies on a large barchan dune.
D4: Proctor crater	-47.8	30.7	ACA and linear	Sand	E	Channel formation and alcove slump, and linear gully changes. See also Diniega et al. (2010), Pasquon et al. (2016).
D5	-49	27.2	ACA and linear	Sand	Various	Multiple changes to gullies including channel formation and changes in linear gullies and associated pits.
D6	-70.4	178.2	ACA and linear	Sand	Various	Dundas et al. (2012). Various changes including sliding blocks of CO2 frost.
D7	-51.9	18.2	Linear	Sand	Various	Various minor changes in linear gullies.
D8: Russell crater dunes	-54.3	12.9	Linear	Sand	SW;W	Common late winter/early spring changes to linear gullies including meter-scale CO2 blocks associated with dark halos around channels. See Dundas et al. (2012) and Reiss et al. (2010).
D10	-45.8	36.7	ACA	Sand	S	Assorted channel changes over several Mars winters.
D12	-45.5	33.9	Linear	Sand	SE	Various minor changes.
D13	-47.2	34	Linear	Sand	Various	Various changes in linear gullies. See also Pasquon et al. (2016).
D14	-52.2	23	Linear	Sand		Various changes in linear gullies including gully formation. See also Pasquon et al. (2016).
D15	-47.2	30.6	Linear	Sand	SW	Various changes in linear gullies.
D16: Kaiser crater dunes	-47.2	19.5	ACA and linear	Sand	Various	Diverse winter activity in gullies. See also Pasquon et al. (2016).
D19	-64.5	158.4	Hybrid	Sand	S;SE
D20: Western Matara dunes	-49.6	34.6	Linear	Sand	Various	Various changes including development of braiding and migrating sinuous bends.
D26	-52	28.5	Linear	Sand	Various	Various minor changes in linear gullies.
D28	-47.3	34.1	Linear	Sand	Various
D29	-47.6	30.4	ACA and linear	Sand	Various	Assorted changes including new pits associated with linear gullies as well as major channel incision and sinuosity development.
D30: Kaiser crater dunes	-47.6	30.4	ACA and linear	Sand	Various	Various changes including channel incision.
D31	-48	303.7	ACA	Sand	Various	Various major changes including massive channel (re-)incision over several Mars winters.
D33	-50.3	292.1	Linear	Sand	S	Channel infill.
D38	-52.5	351.8	Linear	Sand	SE	Extension of linear gully with dark halo.
D39	-40.5	309.9	ACA	Sand; mixed	Various	Assorted channel changes in sand in dune and mixed-substrate gullies. Example: channel extension in ESP_029608_1390 at 8060;1975.
D46	-48.8	34.1	ACA	Sand	E	Major changes in the main gully system. Changes include channel incision and pit formation as well as apparent disappearance of blocks (likely frost or ice-cemented sand).
D47	-36.3	158.2	ACA	Sand	SW	Small new alcove-channel-apron gully near 7500;8500 in ESP_042299_1435.
D50: Rabe crater	-43.5	35	Linear	Sand	SE	See also Pasquon et al. (2016).
D52: Jeans crater	-69.5	153.4	Linear	Sand	S;SW	Multiple tone changes around linear gullies with possible morphological changes.
